# Supplementary material for: Blending Controlled-Release and Urease-Inhibitor Technologies as Innovative Solutions to Reduce Ammonia Emissions in Coffee Environments
Source: MDPI journal article supplement (doi:10.3390/soilsystems7040083), 2023-09-30
Supplement: s1 [file s1]

# 2 Blending controlled-release and urease-inhibitor technologies 3 as innovative solutions to reduce ammonia emissions in 4 coffee environments

5 Tainah Freitas <sup>1</sup>, Damiany Pádua Oliveira <sup>2</sup>, Mateus Portes Dutra <sup>2</sup>, Pauliana Cristina Zito <sup>1</sup>, Estevam Antônio  
6 Chagas Reis <sup>1</sup>, Tales Jesus Fernandes <sup>3</sup>, Ana Paula Pereira Nunes <sup>2</sup>, Rubens José Guimarães<sup>1</sup>, Flávio Henrique  
7 Silveira Rabêlo <sup>2</sup>, Douglas Guelfi <sup>2,\*</sup>

## 8 Supporting information

### 9 Table S1

10 Chemical and physical characterization of the soil of the experimental area before setting up the experiments, in  
11 October 2017.

| <sup>1</sup> Characteristic    | Unit                               | Soil depth layers (cm) |         |         |         |         |
|--------------------------------|------------------------------------|------------------------|---------|---------|---------|---------|
|                                |                                    | 0 - 10                 | 10 - 20 | 20 - 40 | 40 - 60 |         |
| pH                             | -                                  | 5.5                    | 5.7     | 5.6     | 5.6     |         |
| P                              | mg dm <sup>-3</sup>                | 46.67                  | 10.72   | 5.25    | 2.30    |         |
| K                              | mg dm <sup>-3</sup>                | 361.39                 | 270.12  | 236.30  | 219.93  |         |
| Ca <sup>2+</sup>               | cmol <sub>c</sub> dm <sup>-3</sup> | 2.59                   | 1.90    | 1.38    | 1.10    |         |
| Mg <sup>2+</sup>               | cmol <sub>c</sub> dm <sup>-3</sup> | 2.31                   | 1.05    | 0.59    | 0.36    |         |
| S                              | mg dm <sup>-3</sup>                | 27.32                  | 26.44   | 30.42   | 48.61   |         |
| Cu                             | mg dm <sup>-3</sup>                | 5.21                   | 4.97    | 3.31    | 2.22    |         |
| B                              | mg dm <sup>-3</sup>                | 0.06                   | 0.49    | 0.46    | 0.38    |         |
| Zn                             | mg dm <sup>-3</sup>                | 12.41                  | 5.80    | 2.22    | 1.32    |         |
| Fe                             | mg dm <sup>-3</sup>                | 39.43                  | 57.45   | 65.69   | 50.52   |         |
| Mn                             | mg dm <sup>-3</sup>                | 38.07                  | 34.73   | 20.93   | 13.83   |         |
| Al <sup>3+</sup>               | cmol <sub>c</sub> dm <sup>-3</sup> | 0.04                   | 0.09    | 0.08    | 0.08    |         |
| H+Al                           | cmol <sub>c</sub> dm <sup>-3</sup> | 3.95                   | 3.54    | 3.70    | 3.00    |         |
| Sum of bases (SB)              | cmol <sub>c</sub> dm <sup>-3</sup> | 5.83                   | 3.64    | 2.57    | 2.02    |         |
| Effective CEC (t)              | cmol <sub>c</sub> dm <sup>-3</sup> | 5.87                   | 3.73    | 2.65    | 2.10    |         |
| Potential CEC (T)              | cmol <sub>c</sub> dm <sup>-3</sup> | 9.78                   | 7.18    | 6.27    | 5.02    |         |
| Aluminum saturation (m)        | %                                  | 0.68                   | 2.41    | 3.01    | 3.81    |         |
| Base saturation (V)            | %                                  | 59.58                  | 50.70   | 41.03   | 40.27   |         |
| Organic matter                 | dag kg <sup>-1</sup>               | 2.47                   | 1.89    | 1.50    | 1.69    |         |
| Remaining P                    | mg L <sup>-1</sup>                 | 30.20                  | 28.15   | 18.60   | 15.92   |         |
| Sand                           | dag kg <sup>-1</sup>               | 480                    | 470     | 460     | 460     |         |
| Silt                           | dag kg <sup>-1</sup>               | 90                     | 100     | 110     | 100     |         |
| Clay                           | dag kg <sup>-1</sup>               | 430                    | 430     | 430     | 440     |         |
| Characteristic                 | Unit                               | Soil depth layers (cm) |         |         |         |         |
|                                |                                    | 0 - 5                  | 5 - 10  | 10 - 20 | 20 - 40 | 40 - 60 |
| Soil bulk density              | kg dm <sup>-3</sup>                | 1.20                   | 1.29    | 1.26    | 1.20    | 1.19    |
| Total nitrogen                 | g dm <sup>-3</sup>                 | 3.33                   | 2.95    | 2.15    | 1.75    | 1.45    |
| Available mineral nitrogen     | mg dm <sup>-3</sup>                | 65.87                  | 61.07   | 56.12   | 49.70   | 47.18   |
| N-NH <sub>4</sub> <sup>+</sup> | mg dm <sup>-3</sup>                | 27.61                  | 27.09   | 25.44   | 22.32   | 21.16   |
| N-NO <sub>3</sub> <sup>-</sup> | mg dm <sup>-3</sup>                | 38.26                  | 33.98   | 30.68   | 27.38   | 26.02   |

- 12 <sup>1</sup>pH: in KCl ratio 1:2.5. P, K, Fe, Zn, Mn, and Cu: Mehlich 1 extraction solution. Ca, Mg, and Al: KCl (1 mol l<sup>-1</sup>) extraction solution.
- 13 S: monocalcium phosphate in acetic acid extraction solution. H + Al: SMP extraction solution. Organic matter: oxidation with
- 14 Na<sub>2</sub>Cr<sub>2</sub>O<sub>7</sub> 4N + H<sub>2</sub>SO<sub>4</sub> 10N. B: hot water extraction. Soil bulk density: volumetric ring method. N-NH<sub>4</sub><sup>+</sup> and N-NO<sub>3</sub><sup>-</sup>: nitrogen in the
- 15 ammonium and nitrate forms, respectively.

16 **Table S2**  
17 Date of removal of sponges for evaluation of volatilized N-NH<sub>3</sub>.

| <sup>1</sup> Fertilizers | <sup>2</sup> Parceled application                        | Date of removal of sponges for evaluation of volatilized N-NH <sub>3</sub>                                                                              |                                                                                                                                                        |
|--------------------------|----------------------------------------------------------|---------------------------------------------------------------------------------------------------------------------------------------------------------|--------------------------------------------------------------------------------------------------------------------------------------------------------|
|                          |                                                          | Day(s) after nitrogen fertilization                                                                                                                     |                                                                                                                                                        |
|                          |                                                          | 2017-18 Crop Year                                                                                                                                       | 2018-19 Crop Year                                                                                                                                      |
| UCon and UNBPT           | 1                                                        | 1, 2, 3, 4, 5, 6, 8, 10, 11, 13, 17, 21                                                                                                                 | 1, 2, 3, 4, 5, 6, 8, 11, 15, 20, 25                                                                                                                    |
|                          | 2                                                        | 1, 2, 3, 4, 5, 6, 8, 11, 15, 20, 27                                                                                                                     | 1, 2, 3, 4, 5, 6, 8, 11, 15, 19, 25                                                                                                                    |
|                          | 3                                                        | 1, 2, 3, 4, 5, 6, 8, 11, 14, 18, 23, 29, 36                                                                                                             | 1, 2, 3, 4, 5, 6, 8, 11, 15, 20, 25                                                                                                                    |
|                          | <i>Equivalence in days after the first fertilization</i> | 1, 2, 3, 4, 5, 6, 8, 10, 13, 17, 21, 29, 30, 31, 32, 33, 34, 36, 39, 43, 48, 55, 57, 58, 59, 60, 61, 62, 64, 67, 70, 74, 79, 85, 92                     | 1, 2, 3, 4, 5, 6, 8, 11, 15, 20, 25, 29, 30, 31, 32, 33, 34, 36, 39, 43, 47, 53, 57, 58, 59, 60, 61, 62, 64, 67, 71, 76, 81                            |
|                          | <sup>§</sup> Single application                          | 1, 2, 3, 4, 5, 6, 7, 8, 10, 13, 17, 21, 29, 36, 43, 49, 55, 64, 67, 74, 81, 85, 92, 99, 107, 113, 120, 128, 134, 140, 148, 156, 162, 169, 176, 186, 195 | 1, 2, 3, 4, 5, 6, 8, 11, 15, 20, 25, 32, 39, 46, 53, 60, 67, 74, 81, 88, 95, 102, 109, 116, 123, 130, 137, 145, 151, 158, 165, 172, 179, 186, 193, 200 |

18 <sup>1</sup>Fertilizers – UCon: conventional urea. UNBPT: urea with N-(n-butyl) thiophosphoric triamide (NBPT). EMax41: urea E-Max 41%.  
19 EMax43: urea E-Max 43%. Blend41: mixture of UNBPT with EMax41. Blend43: mixture of UNBPT with EMax43.

20 <sup>2</sup>Parceled application: fractionation of nitrogen fertilization in 1/3 of the 300 kg N ha<sup>-1</sup> application rate. <sup>§</sup>Application rate: 300 kg  
21 N ha<sup>-1</sup>.

22

23

**Table S3**  
Rainfall and soil moisture and temperature in the first 6 days after single application of the fertilizer or after parceled applications of the fertilizer.

| Characteristic        | Parceled application <sup>1</sup> | 2017-18 crop year          |       |       |       |       |       |      |
|-----------------------|-----------------------------------|----------------------------|-------|-------|-------|-------|-------|------|
|                       |                                   | Day(s) after fertilization |       |       |       |       |       |      |
|                       |                                   | 1                          | 2     | 3     | 4     | 5     | 6     | Σ    |
| Rainfall (mm)         | 1 <sup>2</sup>                    | 23.5                       | 10    | 0     | 0     | 0     | 0     | 33.5 |
|                       | 2                                 | 52                         | 0     | 0     | 0     | 0     | 0     | 52   |
|                       | 3                                 | 15                         | 37    | 21    | 5     | 6     | 0     | 84   |
| Soil moisture (%)     | 1                                 | 14.50                      | 20.70 | 20.40 | 19.60 | 19.80 | 17.70 | -    |
|                       | 2                                 | 25.90                      | 24.10 | 17.60 | 21.10 | 18.80 | 19.40 | -    |
|                       | 3                                 | 25.40                      | 24.50 | 23.70 | 21.60 | 24.80 | 23.40 | -    |
| Soil temperature (°C) | 1                                 | 20.3                       | 20.2  | 19.4  | 20.2  | 20.4  | 20.9  | -    |
|                       | 2                                 | 21.6                       | 21.7  | 21.3  | 20.5  | 20.7  | 21.3  | -    |
|                       | 3                                 | 20.6                       | 20.2  | 20.4  | 21.1  | 21.2  | 20.8  | -    |
| Characteristic        | Parceled application <sup>1</sup> | 2018-19 crop year          |       |       |       |       |       |      |
|                       |                                   | Day(s) after fertilization |       |       |       |       |       |      |
|                       |                                   | 1                          | 2     | 3     | 4     | 5     | 6     | Σ    |
| Rainfall (mm)         | 1 <sup>2</sup>                    | 10                         | 0     | 0     | 0     | 0     | 3     | 13   |
|                       | 2                                 | 0                          | 0     | 0     | 0     | 0     | 0     | 0    |
|                       | 3                                 | 7                          | 10    | 0     | 0     | 0     | 0     | 17   |
| Soil moisture (%)     | 1                                 | 20.90                      | 22.30 | 19.30 | 19.60 | 16.40 | 17.90 | -    |
|                       | 2                                 | 18.40                      | 17.90 | 17.50 | 18.70 | 16.60 | 16.90 | -    |
|                       | 3                                 | 23.30                      | 23.30 | 22.80 | 19.70 | 17.10 | 17.30 | -    |
| Soil temperature (°C) | 1                                 | 19.7                       | 20.8  | 21.2  | 21.8  | 22.0  | 22.0  | -    |
|                       | 2                                 | 18.7                       | 19.3  | 20.2  | 21.1  | 20.7  | 21.2  | -    |
|                       | 3                                 | 20.9                       | 21.5  | 22.0  | 22.6  | 22.6  | 22.0  | -    |

<sup>1</sup>Parceled application of the nitrogen fertilizer at 1/3 of the 300 kg N ha<sup>-1</sup> application rate.

<sup>2</sup>First parceled application of the conventional urea and of urea with N-(n-butyl) thiophosphoric triamide (NBPT) or single application of the controlled-release fertilizers (EMAx41; EMaX43) or of their corresponding blends (Blend41 and Blend43) in the crop year. EMaX41: urea E-Max 41%. EMaX43: urea E-Max 43%. Blend41: mixture of UNBPT with EMaX41. Blend43: mixture of UNBPT with EMaX43.

33  
34  
35

34  
35

36  
37  
38  
39  
40

36  
37  
38  
39  
40

41 **Table S5**  
42 Regressions of coffee bean yield according to type of nitrogen fertilizer and application rates.\*

| <sup>1</sup> Fertilizer | Equations (coefficients in kg ha <sup>-1</sup> )                                                              | R <sup>2</sup> |
|-------------------------|---------------------------------------------------------------------------------------------------------------|----------------|
|                         | -----2017-18 Crop year -----                                                                                  |                |
| UCon                    | Y = 3065.1570 + 2.599x if x < 243.01; Y = 3694.70 if x ≥ 243.01 kg N ha <sup>-1</sup>                         | -              |
| UNBPT                   | Y = 2988.2 + 0.7576x                                                                                          | 0.97           |
| EMax41                  | Y = 3121.5867 + 1.6294x if x < 292.40 kg N ha <sup>-1</sup> ; Y = 3597.90 if x ≥ 292.40 kg N ha <sup>-1</sup> | -              |
| EMax43                  | Y = 3039.4025 + 2.7363x if x < 236.82 kg N ha <sup>-1</sup> ; Y = 3685.74 if x ≥ 236.82 kg N ha <sup>-1</sup> | -              |
| Blend41                 | Y = 2956.10 + 1.452x                                                                                          | 0.94           |
| Blend43                 | Y = 2923.80 + 1.7848x                                                                                         | 0.89           |
| Fertilizer              | ----- 2018-19 Crop year -----                                                                                 | R <sup>2</sup> |
| UCon                    | Y = 564.28 + 0.7639x                                                                                          | 0.95           |
| UNBPT                   | Y = 595.16 + 1.1349x                                                                                          | 0.99           |
| EMax41                  | Y = 591.01 + 1.2687x                                                                                          | 0.95           |
| EMax43                  | Y = 628.1106 + 0.9036x if x < 374.84 kg N ha <sup>-1</sup> ; Y = 966.80 if x ≥ 374.84 kg N ha <sup>-1</sup>   | -              |
| Blend41                 | Y = 607.31 + 3.1012x - 0.0035x <sup>2</sup>                                                                   | 0.88           |
| Blend43                 | Y = 665.3617 + 1.268x if x < 362.55 kg N ha <sup>-1</sup> ; Y = 1125.10 if x ≥ 362.55 kg N ha <sup>-1</sup>   | -              |

43 \*Equations corresponding to Figure 6. <sup>1</sup>Fertilizer – UCon: conventional urea. UNBPT: urea with n-(n-butyl) thiophosphoric triamide (NBPT).  
44 EMax41: urea E-Max 41%. EMax43: urea E-Max 43%. Blend41: mixture of urea with n-(n-butyl) thiophosphoric triamide (NBPT) and EMax41.  
45 Blend43: mixture of urea with n-(n-butyl) thiophosphoric triamide (NBPT) and EMax43. R<sup>2</sup>: Coefficient of determination

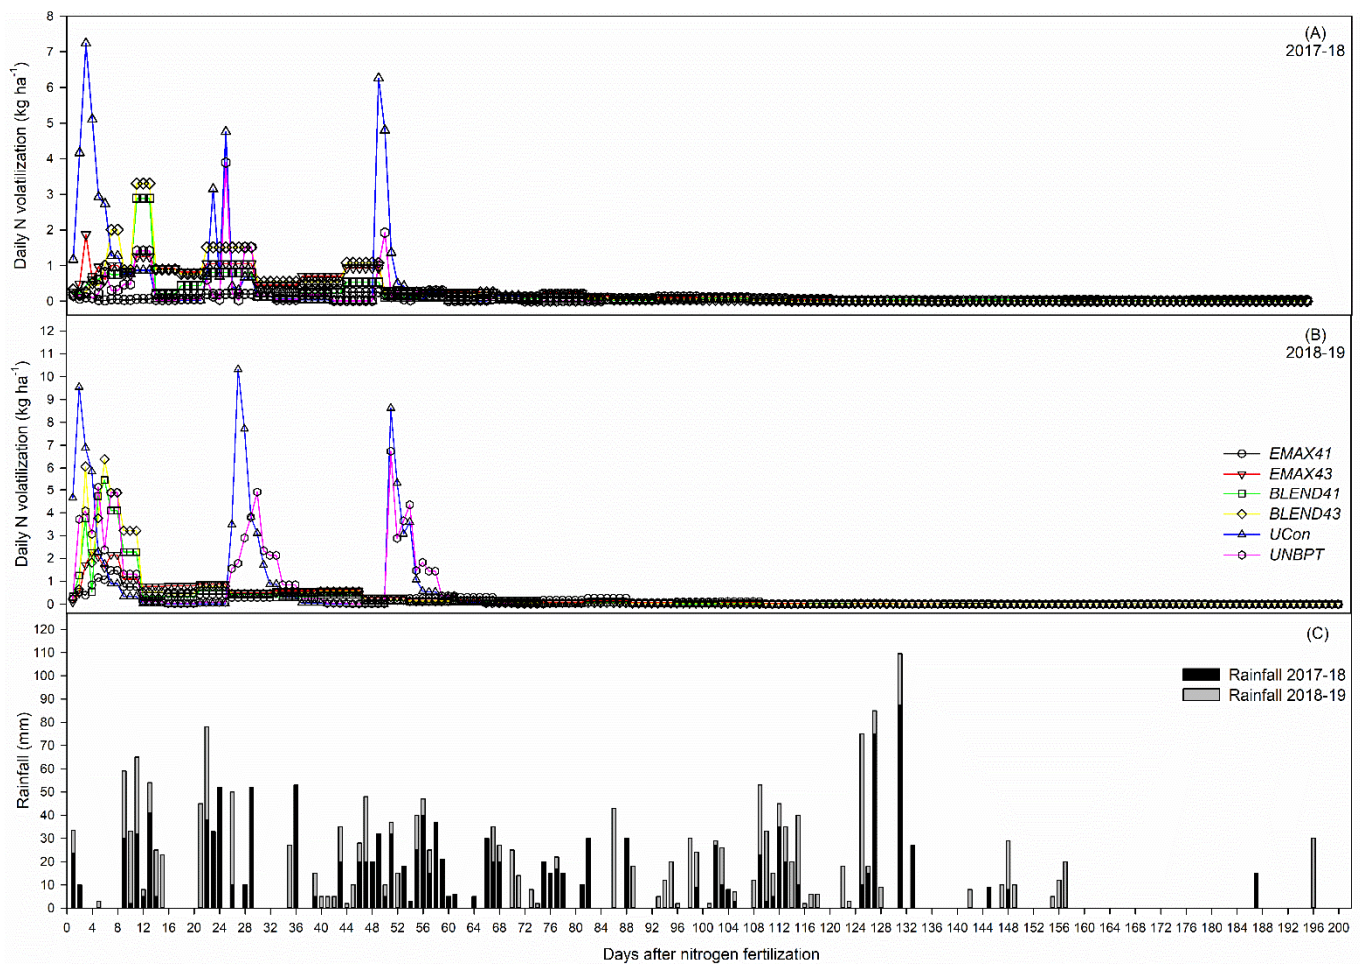

**Fig. S1** Daily volatilization [per parceled application of UCon and UNBPT (A) and per single application [for controlled-release fertilizers and blends (B)], with rainfall (C) in two agricultural crop years with arabica coffee.

Parceled applications of nitrogen fertilization of UCon and UNBPT at  $\frac{1}{3}$  of the 300 kg N ha<sup>-1</sup> application rate carried out in November, December, and January of the 2017-18 and 2018-19 crop years. Total fertilization (300 kg N ha<sup>-1</sup>) with EMax41, EMax43, Blend41, and Blend43 carried out in November of each crop year.

Fertilizer – UCon: conventional urea. UNBPT: urea with N-(n-butyl) thiophosphoric triamide (NBPT). EMax41: urea E-Max 41%. EMax43: urea E-Max 43%. Blend41: mixture of UNBPT with EMax41. Blend43: mixture of UNBPT with EMax43.
